# Supplementary material for: Inflammation- and Metastasis-Related Proteins Expression Changes in Early Stages in Tumor and Non-Tumor Adjacent Tissues of Colorectal Cancer Samples
Source: MDPI journal article supplement (doi:10.3390/cancers14184487), 2022-09-16
Supplement: s1 [file s1]

**Supplementary Table S1.** Clinicopathological features of patient's samples included in the study.

| Age | BMI  | Stage | TNM       | Histological grade | Tumor location               | Metastasis           |
|-----|------|-------|-----------|--------------------|------------------------------|----------------------|
| 78  | 25.6 | I     | T2N0M0    | -                  | -                            | No                   |
| 56  | -    | I     | T1N0MX    | G2                 | Sigmoid colon                | No                   |
| 59  | -    | I     | T2N0MX    | G1                 | Sigmoid colon and rectum     | No                   |
| 83  | 28.2 | I     | T2N0M0    | G2                 | Descending and rectum        | Yes (local and lung) |
| 79  | -    | I     | T2N0MX    | G2                 | Descending                   | No                   |
| 65  | -    | I     | T2N0M0    | G3                 | Ascending                    | No                   |
| 64  | -    | I     | T2N0MX    | G2                 | Descending                   | No                   |
| 56  | -    | I     | T2PN0M0   | G1                 | Descending                   | No                   |
| 77  | 25.5 | IIA   | T3BN0MX   | G3                 | Right colon at hepatic angle | No                   |
| 78  | 29.7 | IIA   | T3N0MX    | G2                 | Rectum - sigmoid union       | No                   |
| 70  | 22.6 | IIA   | PT3BN0M0  | G2                 | Rectum                       | No                   |
| 67  | 26.7 | IIA   | T3CN0M0   | G2                 | Rectum – sigmoid union       | No                   |
| 60  | -    | IIA   | T3(M)N0MX | G1                 | Ascending                    | No                   |
| 74  | -    | IIA   | T3BN0MX   | G3                 | Ascending                    | No                   |
| 72  | -    | IIA   | T33N0MX   | G1                 | Descending                   | No                   |
| 50  | -    | IIA   | T3CPN0M0  | G2                 | Descending                   | No                   |
| 88  | -    | IIA   | T3N0M0    | G1                 | Sigmoid                      | No                   |
| 81  | 20.8 | IIA   | T3PN0M0   | G2                 | Descending                   | No                   |
| 81  | 24.2 | IIIB  | T3BN1M0   | G1                 | Transverse                   | No                   |
| 82  | 26.3 | IIIB  | T3N1M0    | G2                 | Ascending – Caecum           | No                   |
| 50  | 25.5 | IIIC  | T4BPN2M0  | G2                 | Sigmoid                      | No                   |
| 67  | 24.9 | IIIC  | T3N2BM0   | G3                 | Ascending                    | No                   |
| 70  | 22.1 | IIIA  | T2N1M0    | G2                 | Rectum                       | No                   |
| 51  | 22.6 | IIIC  | T4BN2M0   | G2                 | Sigmoid                      | No                   |
| 69  | 27.6 | IIIB  | T3N1M0    | G3                 | Ascending                    | No                   |
| 83  | 24.7 | IIIB  | T3N2M0    | G3                 | Ascending                    | No                   |
| 92  | -    | IVA-B | T3N2M1    | G2                 | Transverse - Sigmoid         | Yes                  |
| 83  | -    | IVA-B | T3BN2MX   | G3                 | Ascending - Caecum           | Yes                  |
| 63  | 24.4 | IVA-B | T2PN2PM1  | -                  | Descending - Rectum          | Yes                  |
| 78  | 33.5 | IVA-B | T3PN1M1   | G1                 | Hepatic angle                | Yes                  |
| 52  | 23.4 | IVA-B | T3N1M1    | -                  | Sigmoid                      | Yes                  |
| 80  | 23.6 | IVA-B | T4N2M1    | G2                 | Sigmoid                      | Yes                  |
| 55  | 20.3 | IV-B  | T4PN2M1   | G3                 | Ascending                    | Yes                  |
| 76  | 23.4 | IVA-B | T3N1M1    | G2                 | Ascending                    | Yes                  |
| 67  | 34.2 | IVA-B | T3PN2M1   | G3                 | Ascending                    | Yes                  |
| 74  | 18.8 | IVA-B | PT4PN0M   | G3                 | Rectum                       | Yes                  |
| 65  | 32.9 | IV    | T3N2M1    | G2                 | Sigmoid - Rectum             | Yes                  |
| 95  | 27.9 | IV    | T3N2M1    | G2                 | Ascending - Transverse       | Yes                  |
